# Supplementary material
Source: publisher figshare collection journal article supplement (https://gsajournals.figshare.com/ndownloader/files/13192322)
Supplement: Supplementary file 1 [file 13192322]

## Sheet: sac3a All genes affected
	Reference list	Client Text Box Input
Mapped IDs:	27502 out of 27502	3283 out of 3309
Unmapped IDs:	0	183
Multiple mapping information:	0	64
	Arabidopsis thaliana (REF)	Client Text Box Input
PANTHER GO-Slim Biological Process	#	#	expected	+/-	Fold Enrichment	raw P value	FDR
rRNA metabolic process (GO:0016072)	148	53	17.81	+	2.98	5.1e-10	1.92e-08
DNA replication (GO:0006260)	129	41	15.52	+	2.64	5.89e-07	1.11e-05
RNA metabolic process (GO:0016070)	1603	339	192.87	+	1.76	3.59e-20	6.75e-18
DNA metabolic process (GO:0006259)	351	74	42.23	+	1.75	3.53e-05	0.000554
cellular component biogenesis (GO:0044085)	790	157	95.05	+	1.65	3.31e-08	6.91e-07
regulation of nucleobase-containing compound metabolic process (GO:0019219)	409	78	49.21	+	1.59	0.00037	0.00536
translation (GO:0006412)	308	58	37.06	+	1.57	0.0028	0.0293
nucleobase-containing compound metabolic process (GO:0006139)	2727	502	328.11	+	1.53	7.2e-19	6.77e-17
nitrogen compound metabolic process (GO:0006807)	2924	495	351.81	+	1.41	6.16e-13	3.86e-11
transcription, DNA-dependent (GO:0006351)	753	124	90.6	+	1.37	0.00157	0.0211
cellular component organization or biogenesis (GO:0071840)	1640	269	197.32	+	1.36	2.55e-06	4.36e-05
primary metabolic process (GO:0044238)	5340	808	642.5	+	1.26	3.15e-11	1.48e-09
cellular component organization (GO:0016043)	1359	202	163.51	+	1.24	0.0049	0.0485
cellular process (GO:0009987)	6866	982	826.11	+	1.19	7.02e-09	1.89e-07
metabolic process (GO:0008152)	6924	988	833.09	+	1.19	9.86e-09	2.32e-07
Unclassified (UNCLASSIFIED)	18178	2007	2187.15	-	0.92	7.27e-10	2.28e-08
protein localization (GO:0008104)	474	34	57.03	-	0.6	0.00232	0.0256
regulation of catalytic activity (GO:0050790)	79	1	9.51	-	0.11	0.00186	0.0233
regulation of molecular function (GO:0065009)	81	1	9.75	-	0.1	0.00189	0.0222
	Arabidopsis thaliana (REF)	Client Text Box Input
PANTHER GO-Slim Molecular Function	#	#	expected	+/-	Fold Enrichment	raw P value	FDR
peroxidase activity (GO:0004601)	66	22	7.94	+	2.77	0.000163	0.0032
DNA helicase activity (GO:0003678)	52	17	6.26	+	2.72	0.0012	0.0157
antioxidant activity (GO:0016209)	86	26	10.35	+	2.51	0.000156	0.0035
RNA binding (GO:0003723)	739	206	88.92	+	2.32	1.27e-23	2e-21
helicase activity (GO:0004386)	87	23	10.47	+	2.2	0.00167	0.0202
nucleotidyltransferase activity (GO:0016779)	128	33	15.4	+	2.14	0.000276	0.00481
nucleic acid binding (GO:0003676)	1759	368	211.64	+	1.74	2.75e-21	1.44e-19
transmembrane receptor protein serine/threonine kinase activity (GO:0004675)	334	66	40.19	+	1.64	0.000437	0.00686
receptor activity (GO:0004872)	361	69	43.43	+	1.59	0.000702	0.01
oxidoreductase activity (GO:0016491)	1141	186	137.28	+	1.35	0.000137	0.0036
binding (GO:0005488)	3418	552	411.25	+	1.34	2.3e-11	9.03e-10
catalytic activity (GO:0003824)	5737	797	690.27	+	1.15	2.3e-05	0.000724
Unclassified (UNCLASSIFIED)	18253	1906	2196.17	-	0.87	4.77e-23	3.75e-21
receptor binding (GO:0005102)	78	1	9.38	-	0.11	0.00284	0.0319
	Arabidopsis thaliana (REF)	Client Text Box Input
PANTHER Protein Class	#	#	expected	+/-	Fold Enrichment	raw P value	FDR
tubulin (PC00228)	17	11	2.05	+	5.38	8.1e-05	0.00158
serine/threonine protein kinase receptor (PC00205)	206	89	24.79	+	3.59	4.35e-20	2.55e-18
translation elongation factor (PC00222)	44	14	5.29	+	2.64	0.00415	0.0406
DNA helicase (PC00011)	52	16	6.26	+	2.56	0.00235	0.0276
ATP-binding cassette (ABC) transporter (PC00003)	86	23	10.35	+	2.22	0.00155	0.021
protein kinase (PC00193)	475	115	57.15	+	2.01	2.51e-10	6.32e-09
RNA binding protein (PC00031)	1115	268	134.16	+	2	2.4e-22	4.22e-20
kinase (PC00137)	606	138	72.91	+	1.89	1.37e-10	4.03e-09
transporter (PC00227)	953	204	114.66	+	1.78	7.33e-13	3.22e-11
nucleic acid binding (PC00171)	1771	367	213.08	+	1.72	1.37e-20	1.2e-18
reductase (PC00198)	257	50	30.92	+	1.62	0.00287	0.0316
ribosomal protein (PC00202)	322	62	38.74	+	1.6	0.00115	0.0168
oxygenase (PC00177)	308	57	37.06	+	1.54	0.00373	0.0387
transferase (PC00220)	1342	231	161.47	+	1.43	7.53e-07	1.66e-05
oxidoreductase (PC00176)	1012	167	121.76	+	1.37	0.00018	0.00316
Unclassified (UNCLASSIFIED)	19939	2219	2399.03	-	0.92	9.43e-11	3.32e-09
membrane traffic protein (PC00150)	267	12	32.13	-	0.37	0.000192	0.00307
non-motor actin binding protein (PC00165)	130	4	15.64	-	0.26	0.00179	0.0225
	Arabidopsis thaliana (REF)	Client Text Box Input
GO cellular component complete	#	#	expected	+/-	Fold Enrichment	raw P value	FDR
tubulin complex (GO:0045298)	13	10	1.56	+	6.39	6.14e-05	0.00395
small-subunit processome (GO:0032040)	18	9	2.17	+	4.16	0.00145	0.0451
preribosome (GO:0030684)	31	15	3.73	+	4.02	5.62e-05	0.00387
small nucleolar ribonucleoprotein complex (GO:0005732)	32	13	3.85	+	3.38	0.000656	0.0235
nucleolar part (GO:0044452)	43	16	5.17	+	3.09	0.000363	0.0146
nucleolus (GO:0005730)	398	114	47.89	+	2.38	3.42e-14	3.3e-11
spliceosomal complex (GO:0005681)	100	27	12.03	+	2.24	0.000464	0.0179
nuclear lumen (GO:0031981)	804	169	96.74	+	1.75	2.79e-10	6.74e-08
plant-type cell wall (GO:0009505)	328	66	39.46	+	1.67	0.000286	0.0125
intracellular organelle lumen (GO:0070013)	973	190	117.07	+	1.62	3.2e-09	4.42e-07
membrane-enclosed lumen (GO:0031974)	973	190	117.07	+	1.62	3.2e-09	3.86e-07
organelle lumen (GO:0043233)	973	190	117.07	+	1.62	3.2e-09	3.44e-07
external encapsulating structure (GO:0030312)	703	136	84.58	+	1.61	1.02e-06	8.97e-05
cell wall (GO:0005618)	703	136	84.58	+	1.61	1.02e-06	8.22e-05
intracellular non-membrane-bounded organelle (GO:0043232)	1404	268	168.93	+	1.59	1.23e-11	5.94e-09
non-membrane-bounded organelle (GO:0043228)	1404	268	168.93	+	1.59	1.23e-11	3.96e-09
nuclear part (GO:0044428)	1030	195	123.93	+	1.57	1.79e-08	1.73e-06
ribonucleoprotein complex (GO:1990904)	690	123	83.02	+	1.48	9.04e-05	0.00545
intracellular ribonucleoprotein complex (GO:0030529)	689	122	82.9	+	1.47	0.000141	0.00754
cytosol (GO:0005829)	1948	289	234.38	+	1.23	0.000747	0.0258
cell periphery (GO:0071944)	4199	596	505.22	+	1.18	5.39e-05	0.004
plastid (GO:0009536)	3976	558	478.39	+	1.17	0.000276	0.0127
chloroplast (GO:0009507)	3916	549	471.17	+	1.17	0.000341	0.0143
intracellular organelle part (GO:0044446)	4617	644	555.51	+	1.16	0.00015	0.0076
organelle part (GO:0044422)	4628	644	556.83	+	1.16	0.000184	0.00889
cytoplasmic part (GO:0044444)	10187	1324	1225.68	+	1.08	0.000933	0.0311
cytoplasm (GO:0005737)	12584	1620	1514.09	+	1.07	0.000519	0.0193
cell part (GO:0044464)	21355	2717	2569.4	+	1.06	2.37e-09	4.57e-07
cell (GO:0005623)	21357	2717	2569.64	+	1.06	2.69e-09	4.33e-07
membrane protein complex (GO:0098796)	523	33	62.93	-	0.52	0.0001	0.00569
cytoplasmic vesicle part (GO:0044433)	216	10	25.99	-	0.38	0.00109	0.0352

## Sheet: sac3a DEGs
	Reference list	Client Text Box Input
Mapped IDs:	27502 out of 27502	2876 out of 2892
Unmapped IDs:	0	170
Multiple mapping information:	0	52
	Arabidopsis thaliana (REF)	Client Text Box Input
PANTHER GO-Slim Biological Process	#	#	expected	+/-	Fold Enrichment	raw P value	FDR
rRNA metabolic process (GO:0016072)	148	53	15.56	+	3.41	4.38e-12	2.06e-10
DNA replication (GO:0006260)	129	38	13.57	+	2.8	3.57e-07	6.7e-06
DNA metabolic process (GO:0006259)	351	67	36.91	+	1.82	2.3e-05	0.00036
RNA metabolic process (GO:0016070)	1603	302	168.57	+	1.79	1.67e-19	3.13e-17
steroid metabolic process (GO:0008202)	214	39	22.5	+	1.73	0.00246	0.0231
cellular component biogenesis (GO:0044085)	790	143	83.07	+	1.72	1.14e-08	3.56e-07
translation (GO:0006412)	308	55	32.39	+	1.7	0.000574	0.00635
regulation of nucleobase-containing compound metabolic process (GO:0019219)	409	67	43.01	+	1.56	0.00119	0.0124
nucleobase-containing compound metabolic process (GO:0006139)	2727	438	286.76	+	1.53	8.36e-17	7.86e-15
nitrogen compound metabolic process (GO:0006807)	2924	446	307.48	+	1.45	8.26e-14	5.18e-12
cellular component organization or biogenesis (GO:0071840)	1640	237	172.46	+	1.37	5.16e-06	8.81e-05
transcription, DNA-dependent (GO:0006351)	753	107	79.18	+	1.35	0.00456	0.039
primary metabolic process (GO:0044238)	5340	706	561.53	+	1.26	4.03e-10	1.52e-08
metabolic process (GO:0008152)	6924	869	728.1	+	1.19	1.87e-08	5.03e-07
cellular process (GO:0009987)	6866	857	722	+	1.19	6.92e-08	1.45e-06
Unclassified (UNCLASSIFIED)	18178	1761	1911.53	-	0.92	2.72e-08	6.38e-07
transport (GO:0006810)	1441	117	151.53	-	0.77	0.00518	0.0424
localization (GO:0051179)	1580	125	166.15	-	0.75	0.00123	0.0122
protein transport (GO:0015031)	600	34	63.09	-	0.54	0.000157	0.00211
intracellular protein transport (GO:0006886)	568	32	59.73	-	0.54	0.000187	0.00235
protein localization (GO:0008104)	474	25	49.84	-	0.5	0.000276	0.00325
vesicle-mediated transport (GO:0016192)	520	26	54.68	-	0.48	4.65e-05	0.000672
regulation of catalytic activity (GO:0050790)	79	1	8.31	-	0.12	0.00636	0.0498
regulation of molecular function (GO:0065009)	81	1	8.52	-	0.12	0.00425	0.038
	Arabidopsis thaliana (REF)	Client Text Box Input
PANTHER GO-Slim Molecular Function	#	#	expected	+/-	Fold Enrichment	raw P value	FDR
extracellular matrix structural constituent (GO:0005201)	12	6	1.26	+	4.75	0.00501	0.0414
peroxidase activity (GO:0004601)	66	22	6.94	+	3.17	1.9e-05	0.000595
DNA helicase activity (GO:0003678)	52	16	5.47	+	2.93	0.000523	0.00747
antioxidant activity (GO:0016209)	86	25	9.04	+	2.76	5.12e-05	0.00134
RNA methyltransferase activity (GO:0008173)	45	13	4.73	+	2.75	0.0027	0.0282
DNA-directed RNA polymerase activity (GO:0003899)	60	16	6.31	+	2.54	0.00236	0.0264
RNA binding (GO:0003723)	739	188	77.71	+	2.42	7.19e-24	1.13e-21
helicase activity (GO:0004386)	87	21	9.15	+	2.3	0.00143	0.0173
nucleotidyltransferase activity (GO:0016779)	128	30	13.46	+	2.23	0.000308	0.00538
nucleic acid binding (GO:0003676)	1759	329	184.97	+	1.78	8.24e-21	6.46e-19
transmembrane receptor protein serine/threonine kinase activity (GO:0004675)	334	62	35.12	+	1.77	9.31e-05	0.00183
methyltransferase activity (GO:0008168)	230	41	24.19	+	1.7	0.00333	0.0327
receptor activity (GO:0004872)	361	63	37.96	+	1.66	0.000424	0.00666
oxidoreductase activity (GO:0016491)	1141	167	119.98	+	1.39	9.16e-05	0.00206
binding (GO:0005488)	3418	477	359.42	+	1.33	1.6e-09	6.28e-08
catalytic activity (GO:0003824)	5737	684	603.28	+	1.13	0.000562	0.00735
Unclassified (UNCLASSIFIED)	18253	1670	1919.41	-	0.87	5.59e-20	2.92e-18
protein binding (GO:0005515)	1594	131	167.62	-	0.78	0.00461	0.0402
cytoskeletal protein binding (GO:0008092)	281	14	29.55	-	0.47	0.00361	0.0333
actin binding (GO:0003779)	150	5	15.77	-	0.32	0.00542	0.0425
receptor binding (GO:0005102)	78	1	8.2	-	0.12	0.00625	0.0467
	Arabidopsis thaliana (REF)	Client Text Box Input
PANTHER Protein Class	#	#	expected	+/-	Fold Enrichment	raw P value	FDR
tubulin (PC00228)	17	11	1.79	+	6.15	2.63e-05	0.000514
extracellular matrix structural protein (PC00103)	12	6	1.26	+	4.75	0.00501	0.0441
serine/threonine protein kinase receptor (PC00205)	206	89	21.66	+	4.11	1.23e-23	2.17e-21
translation elongation factor (PC00222)	44	13	4.63	+	2.81	0.00229	0.0212
DNA helicase (PC00011)	52	15	5.47	+	2.74	0.00133	0.0138
ATP-binding cassette (ABC) transporter (PC00003)	86	21	9.04	+	2.32	0.00132	0.0145
protein kinase (PC00193)	475	110	49.95	+	2.2	3.61e-12	1.27e-10
RNA binding protein (PC00031)	1115	239	117.25	+	2.04	1.89e-21	1.67e-19
kinase (PC00137)	606	127	63.72	+	1.99	2.98e-11	8.74e-10
transporter (PC00227)	953	193	100.21	+	1.93	3.01e-15	1.33e-13
nucleic acid binding (PC00171)	1771	328	186.23	+	1.76	3.23e-20	1.9e-18
reductase (PC00198)	257	47	27.03	+	1.74	0.00108	0.0126
oxygenase (PC00177)	308	55	32.39	+	1.7	0.000574	0.00721
ribosomal protein (PC00202)	322	57	33.86	+	1.68	0.000544	0.00737
transferase (PC00220)	1342	210	141.12	+	1.49	1.45e-07	3.18e-06
oxidoreductase (PC00176)	1012	149	106.42	+	1.4	0.000156	0.0025
Unclassified (UNCLASSIFIED)	19939	1949	2096.71	-	0.93	9.95e-09	2.5e-07
cytoskeletal protein (PC00085)	445	28	46.79	-	0.6	0.00559	0.0469
actin family cytoskeletal protein (PC00041)	196	7	20.61	-	0.34	0.00161	0.0157
membrane traffic protein (PC00150)	267	9	28.08	-	0.32	0.000113	0.00199
non-motor actin binding protein (PC00165)	130	2	13.67	-	0.15	0.000468	0.00687
	Arabidopsis thaliana (REF)	Client Text Box Input
GO cellular component complete	#	#	expected	+/-	Fold Enrichment	raw P value	FDR
tubulin complex (GO:0045298)	13	10	1.37	+	7.32	2.14e-05	0.00129
small-subunit processome (GO:0032040)	18	9	1.89	+	4.75	0.000603	0.0253
preribosome (GO:0030684)	31	15	3.26	+	4.6	1.34e-05	0.000862
small nucleolar ribonucleoprotein complex (GO:0005732)	32	13	3.36	+	3.86	0.000201	0.00969
nucleolar part (GO:0044452)	43	16	4.52	+	3.54	8.9e-05	0.00477
nucleolus (GO:0005730)	398	106	41.85	+	2.53	4.2e-15	4.05e-12
plant-type cell wall (GO:0009505)	328	65	34.49	+	1.88	1.22e-05	0.000839
nuclear lumen (GO:0031981)	804	145	84.55	+	1.72	1.08e-08	2.6e-06
external encapsulating structure (GO:0030312)	703	125	73.92	+	1.69	2.05e-07	2.2e-05
cell wall (GO:0005618)	703	125	73.92	+	1.69	2.05e-07	1.98e-05
intracellular non-membrane-bounded organelle (GO:0043232)	1404	238	147.64	+	1.61	2.9e-11	1.4e-08
non-membrane-bounded organelle (GO:0043228)	1404	238	147.64	+	1.61	2.9e-11	9.32e-09
intracellular organelle lumen (GO:0070013)	973	162	102.32	+	1.58	1.66e-07	2.67e-05
membrane-enclosed lumen (GO:0031974)	973	162	102.32	+	1.58	1.66e-07	2.29e-05
organelle lumen (GO:0043233)	973	162	102.32	+	1.58	1.66e-07	2e-05
nuclear part (GO:0044428)	1030	170	108.31	+	1.57	1.2e-07	2.31e-05
ribonucleoprotein complex (GO:1990904)	690	105	72.56	+	1.45	0.000582	0.0255
intracellular ribonucleoprotein complex (GO:0030529)	689	104	72.45	+	1.44	0.000893	0.0359
cell periphery (GO:0071944)	4199	519	441.55	+	1.18	0.000194	0.00987
plastid (GO:0009536)	3976	483	418.1	+	1.16	0.00135	0.0482
cell part (GO:0044464)	21355	2361	2245.61	+	1.05	5.5e-07	4.82e-05
cell (GO:0005623)	21357	2361	2245.82	+	1.05	6.17e-07	4.96e-05
cytoplasmic vesicle (GO:0031410)	499	29	52.47	-	0.55	0.000945	0.0365
intracellular vesicle (GO:0097708)	500	29	52.58	-	0.55	0.000951	0.0353
vesicle (GO:0031982)	520	30	54.68	-	0.55	0.00055	0.0253
membrane protein complex (GO:0098796)	523	24	55	-	0.44	8.81e-06	0.000654
cytoplasmic vesicle part (GO:0044433)	216	5	22.71	-	0.22	2.73e-05	0.00155

## Sheet: sac3a DAS genes
	Reference list	Client Text Box Input
Mapped IDs:	27502 out of 27502	515 out of 532
Unmapped IDs:	0	18
Multiple mapping information:	0	11
	Arabidopsis thaliana (REF)	Client Text Box Input
PANTHER GO-Slim Biological Process	#	#	expected	+/-	Fold Enrichment	raw P value	FDR
mRNA splicing, via spliceosome (GO:0000398)	224	15	4.33	+	3.46	5.82e-05	0.0109
RNA splicing, via transesterification reactions (GO:0000375)	202	13	3.91	+	3.33	0.000257	0.0161
mRNA processing (GO:0006397)	310	18	6	+	3	6.4e-05	0.00602
primary metabolic process (GO:0044238)	5340	134	103.3	+	1.3	0.00133	0.0499
Unclassified (UNCLASSIFIED)	18178	313	351.64	-	0.89	0.000617	0.029
	Arabidopsis thaliana (REF)	Client Text Box Input
PANTHER GO-Slim Molecular Function	#	#	expected	+/-	Fold Enrichment	raw P value	FDR
mRNA binding (GO:0003729)	177	13	3.42	+	3.8	7.51e-05	0.00393
catalytic activity (GO:0003824)	5737	153	110.98	+	1.38	2.04e-05	0.0016
Unclassified (UNCLASSIFIED)	18253	301	353.09	-	0.85	3.49e-06	0.000548
	Arabidopsis thaliana (REF)	Client Text Box Input
PANTHER Protein Class	#	#	expected	+/-	Fold Enrichment	raw P value	FDR
mRNA splicing factor (PC00148)	150	14	2.9	+	4.82	3.25e-06	0.000572
mRNA processing factor (PC00147)	205	16	3.97	+	4.03	5.65e-06	0.000497
Unclassified (UNCLASSIFIED)	19939	340	385.7	-	0.88	1.96e-05	0.00115
	Arabidopsis thaliana (REF)	Client Text Box Input
GO cellular component complete	#	#	expected	+/-	Fold Enrichment	raw P value	FDR
nuclear speck (GO:0016607)	67	14	1.3	+	10.8	3.77e-10	1.82e-07
nuclear body (GO:0016604)	94	16	1.82	+	8.8	3.06e-10	2.95e-07
spliceosomal complex (GO:0005681)	100	13	1.93	+	6.72	2.44e-07	7.84e-05
nucleoplasm part (GO:0044451)	267	18	5.16	+	3.49	1e-05	0.00193
nucleoplasm (GO:0005654)	334	20	6.46	+	3.1	1.68e-05	0.00232
nuclear lumen (GO:0031981)	804	34	15.55	+	2.19	4.49e-05	0.00394
intracellular organelle lumen (GO:0070013)	973	38	18.82	+	2.02	8.03e-05	0.00646
membrane-enclosed lumen (GO:0031974)	973	38	18.82	+	2.02	8.03e-05	0.00596
organelle lumen (GO:0043233)	973	38	18.82	+	2.02	8.03e-05	0.00553
nuclear part (GO:0044428)	1030	36	19.92	+	1.81	0.000834	0.0402
intracellular organelle part (GO:0044446)	4617	120	89.31	+	1.34	0.000684	0.0348
organelle part (GO:0044422)	4628	120	89.52	+	1.34	0.00085	0.0391
nucleus (GO:0005634)	9500	234	183.77	+	1.27	9.56e-06	0.00231
membrane-bounded organelle (GO:0043227)	17166	375	332.06	+	1.13	0.000118	0.00759
organelle (GO:0043226)	17411	379	336.8	+	1.13	0.000157	0.00944
intracellular membrane-bounded organelle (GO:0043231)	17100	372	330.78	+	1.12	0.000247	0.0132
intracellular organelle (GO:0043229)	17402	378	336.63	+	1.12	0.000191	0.0108
intracellular part (GO:0044424)	19440	421	376.05	+	1.12	1.39e-05	0.00223
intracellular (GO:0005622)	19474	421	376.71	+	1.12	1.71e-05	0.00206
cell part (GO:0044464)	21355	453	413.09	+	1.1	1.9e-05	0.00204
cell (GO:0005623)	21357	453	413.13	+	1.1	2.35e-05	0.00227

## Sheet: sac3a IR
	Reference list	Client Text Box Input
Mapped IDs:	27502 out of 27502	356 out of 360
Unmapped IDs:	0	14
Multiple mapping information:	0	4
	Arabidopsis thaliana (REF)	Client Text Box Input
PANTHER GO-Slim Biological Process	#	#	expected	+/-	Fold Enrichment	raw P value	FDR
RNA splicing, via transesterification reactions (GO:0000375)	202	11	2.64	+	4.16	0.000112	0.00699
mRNA splicing, via spliceosome (GO:0000398)	224	12	2.93	+	4.09	6.37e-05	0.012
mRNA processing (GO:0006397)	310	14	4.06	+	3.45	9.29e-05	0.00874
	Arabidopsis thaliana (REF)	Client Text Box Input
PANTHER GO-Slim Molecular Function	#	#	expected	+/-	Fold Enrichment	raw P value	FDR
mRNA binding (GO:0003729)	177	11	2.32	+	4.75	3.63e-05	0.00569
Unclassified (UNCLASSIFIED)	18253	206	238.93	-	0.86	0.000393	0.0309
	Arabidopsis thaliana (REF)	Client Text Box Input
PANTHER Protein Class	#	#	expected	+/-	Fold Enrichment	raw P value	FDR
mRNA splicing factor (PC00148)	150	12	1.96	+	6.11	1.43e-06	0.000126
mRNA processing factor (PC00147)	205	14	2.68	+	5.22	1.13e-06	0.000199
	Arabidopsis thaliana (REF)	Client Text Box Input
GO cellular component complete	#	#	expected	+/-	Fold Enrichment	raw P value	FDR
nuclear speck (GO:0016607)	67	11	0.88	+	12.54	5.17e-09	4.99e-06
nuclear body (GO:0016604)	94	12	1.23	+	9.75	1.34e-08	6.45e-06
spliceosomal complex (GO:0005681)	100	8	1.31	+	6.11	8.23e-05	0.00795
nucleoplasm part (GO:0044451)	267	13	3.5	+	3.72	8.05e-05	0.00863
nucleoplasm (GO:0005654)	334	15	4.37	+	3.43	5.59e-05	0.00674
nucleus (GO:0005634)	9500	167	124.35	+	1.34	4.44e-06	0.00143
membrane-bounded organelle (GO:0043227)	17166	260	224.7	+	1.16	0.000119	0.00883
intracellular membrane-bounded organelle (GO:0043231)	17100	259	223.84	+	1.16	0.000122	0.00842
intracellular organelle (GO:0043229)	17402	263	227.79	+	1.15	0.00011	0.00969
organelle (GO:0043226)	17411	263	227.91	+	1.15	0.000111	0.00891
intracellular part (GO:0044424)	19440	292	254.47	+	1.15	8.41e-06	0.00203
intracellular (GO:0005622)	19474	292	254.91	+	1.15	1.08e-05	0.00148
cell part (GO:0044464)	21355	313	279.54	+	1.12	9.84e-06	0.0019
cell (GO:0005623)	21357	313	279.56	+	1.12	9.86e-06	0.00159

## Sheet: sac3a Alt5SS
	Reference list	Client Text Box Input
Mapped IDs:	27502 out of 27502	98 out of 105
Unmapped IDs:	0	2
Multiple mapping information:	0	5
	Arabidopsis thaliana (REF)	Client Text Box Input
PANTHER GO-Slim Biological Process	#	#	expected	+/-	Fold Enrichment	raw P value	FDR
pyrimidine nucleobase metabolic process (GO:0006206)	34	3	0.13	+	23.11	0.000378	0.0355
translation (GO:0006412)	308	7	1.18	+	5.95	0.000206	0.0388
	Arabidopsis thaliana (REF)	Client Text Box Input
PANTHER GO-Slim Molecular Function	#	#	expected	+/-	Fold Enrichment	raw P value	FDR
No statistically significant results.
	Arabidopsis thaliana (REF)	Client Text Box Input
PANTHER Protein Class	#	#	expected	+/-	Fold Enrichment	raw P value	FDR
translation elongation factor (PC00222)	44	4	0.17	+	23.81	3.38e-05	0.00595
G-protein (PC00020)	95	4	0.36	+	11.03	0.000564	0.0496
translation initiation factor (PC00224)	96	4	0.37	+	10.91	0.000585	0.0343
	Arabidopsis thaliana (REF)	Client Text Box Input
GO cellular component complete	#	#	expected	+/-	Fold Enrichment	raw P value	FDR
nuclear speck (GO:0016607)	67	4	0.26	+	15.64	0.000158	0.0761
nuclear body (GO:0016604)	94	4	0.36	+	11.15	0.000542	0.0748
nuclear lumen (GO:0031981)	804	12	3.07	+	3.91	6.47e-05	0.0624
nuclear part (GO:0044428)	1030	13	3.93	+	3.31	0.000166	0.0534
plasmodesma (GO:0009506)	874	11	3.34	+	3.3	0.000555	0.0669
symplast (GO:0055044)	874	11	3.34	+	3.3	0.000555	0.0595
cell-cell junction (GO:0005911)	876	11	3.34	+	3.29	0.000565	0.0546
cell junction (GO:0030054)	876	11	3.34	+	3.29	0.000565	0.0496
intracellular organelle lumen (GO:0070013)	973	12	3.71	+	3.23	0.000369	0.089
membrane-enclosed lumen (GO:0031974)	973	12	3.71	+	3.23	0.000369	0.0712
organelle lumen (GO:0043233)	973	12	3.71	+	3.23	0.000369	0.0593

## Sheet: sac3a Alt3SS
	Reference list	Client Text Box Input
Mapped IDs:	27502 out of 27502	96 out of 103
Unmapped IDs:	0	4
Multiple mapping information:	0	3
	Arabidopsis thaliana (REF)	Client Text Box Input
PANTHER GO-Slim Biological Process	#	#	expected	+/-	Fold Enrichment	raw P value	FDR
No statistically significant results.
	Arabidopsis thaliana (REF)	Client Text Box Input
PANTHER GO-Slim Molecular Function	#	#	expected	+/-	Fold Enrichment	raw P value	FDR
calcium ion binding (GO:0005509)	76	4	0.28	+	14.05	0.000233	0.0365
calmodulin binding (GO:0005516)	83	4	0.31	+	12.87	0.000321	0.0252
	Arabidopsis thaliana (REF)	Client Text Box Input
PANTHER Protein Class	#	#	expected	+/-	Fold Enrichment	raw P value	FDR
intracellular calcium-sensing protein (PC00131)	70	4	0.26	+	15.26	0.000172	0.0303
calmodulin (PC00061)	70	4	0.26	+	15.26	0.000172	0.0151
	Arabidopsis thaliana (REF)	Client Text Box Input
GO cellular component complete	#	#	expected	+/-	Fold Enrichment	raw P value	FDR
nuclear speck (GO:0016607)	67	4	0.25	+	15.94	0.000147	0.0283
nuclear body (GO:0016604)	94	5	0.35	+	14.2	3.55e-05	0.0343
spliceosomal complex (GO:0005681)	100	5	0.37	+	13.35	4.71e-05	0.0227
plasmodesma (GO:0009506)	874	11	3.27	+	3.36	0.000471	0.0505
symplast (GO:0055044)	874	11	3.27	+	3.36	0.000471	0.0454
cell-cell junction (GO:0005911)	876	11	3.28	+	3.35	0.00048	0.0421
cell junction (GO:0030054)	876	11	3.28	+	3.35	0.00048	0.0386
intracellular organelle lumen (GO:0070013)	973	12	3.64	+	3.29	0.000309	0.0496
membrane-enclosed lumen (GO:0031974)	973	12	3.64	+	3.29	0.000309	0.0426
organelle lumen (GO:0043233)	973	12	3.64	+	3.29	0.000309	0.0372
intracellular organelle part (GO:0044446)	4617	34	17.29	+	1.97	5.56e-05	0.0179
organelle part (GO:0044422)	4628	34	17.33	+	1.96	5.75e-05	0.0139

## Sheet: sac3a ES
	Reference list	Client Text Box Input
Mapped IDs:	27502 out of 27502	19 out of 19
Unmapped IDs:	0	3
Multiple mapping information:	0	0
	Arabidopsis thaliana (REF)	Client Text Box Input
PANTHER GO-Slim Biological Process	#	#	expected	+/-	Fold Enrichment	raw P value	FDR
No statistically significant results.
	Arabidopsis thaliana (REF)	Client Text Box Input
PANTHER GO-Slim Molecular Function	#	#	expected	+/-	Fold Enrichment	raw P value	FDR
No statistically significant results.
	Arabidopsis thaliana (REF)	Client Text Box Input
PANTHER Protein Class	#	#	expected	+/-	Fold Enrichment	raw P value	FDR
No statistically significant results.
	Arabidopsis thaliana (REF)	Client Text Box Input
GO cellular component complete	#	#	expected	+/-	Fold Enrichment	raw P value	FDR
No statistically significant results.

## Sheet: sac3a EI
	Reference list	Client Text Box Input
Mapped IDs:	27502 out of 27502	33 out of 33
Unmapped IDs:	0	1
Multiple mapping information:	0	0
	Arabidopsis thaliana (REF)	Client Text Box Input
PANTHER GO-Slim Biological Process	#	#	expected	+/-	Fold Enrichment	raw P value	FDR
No statistically significant results.
	Arabidopsis thaliana (REF)	Client Text Box Input
PANTHER GO-Slim Molecular Function	#	#	expected	+/-	Fold Enrichment	raw P value	FDR
No statistically significant results.
	Arabidopsis thaliana (REF)	Client Text Box Input
PANTHER Protein Class	#	#	expected	+/-	Fold Enrichment	raw P value	FDR
No statistically significant results.
	Arabidopsis thaliana (REF)	Client Text Box Input
GO cellular component complete	#	#	expected	+/-	Fold Enrichment	raw P value	FDR
No statistically significant results.
